# Supplementary figures and images for: Biomimetic synthesis of RPL14B-based CdSe quantum dots for the detection of heavy metal copper ions
Source: Royal Society of Chemistry journal article supplement (doi:10.1039/d4ra02022g), 2024-01-01

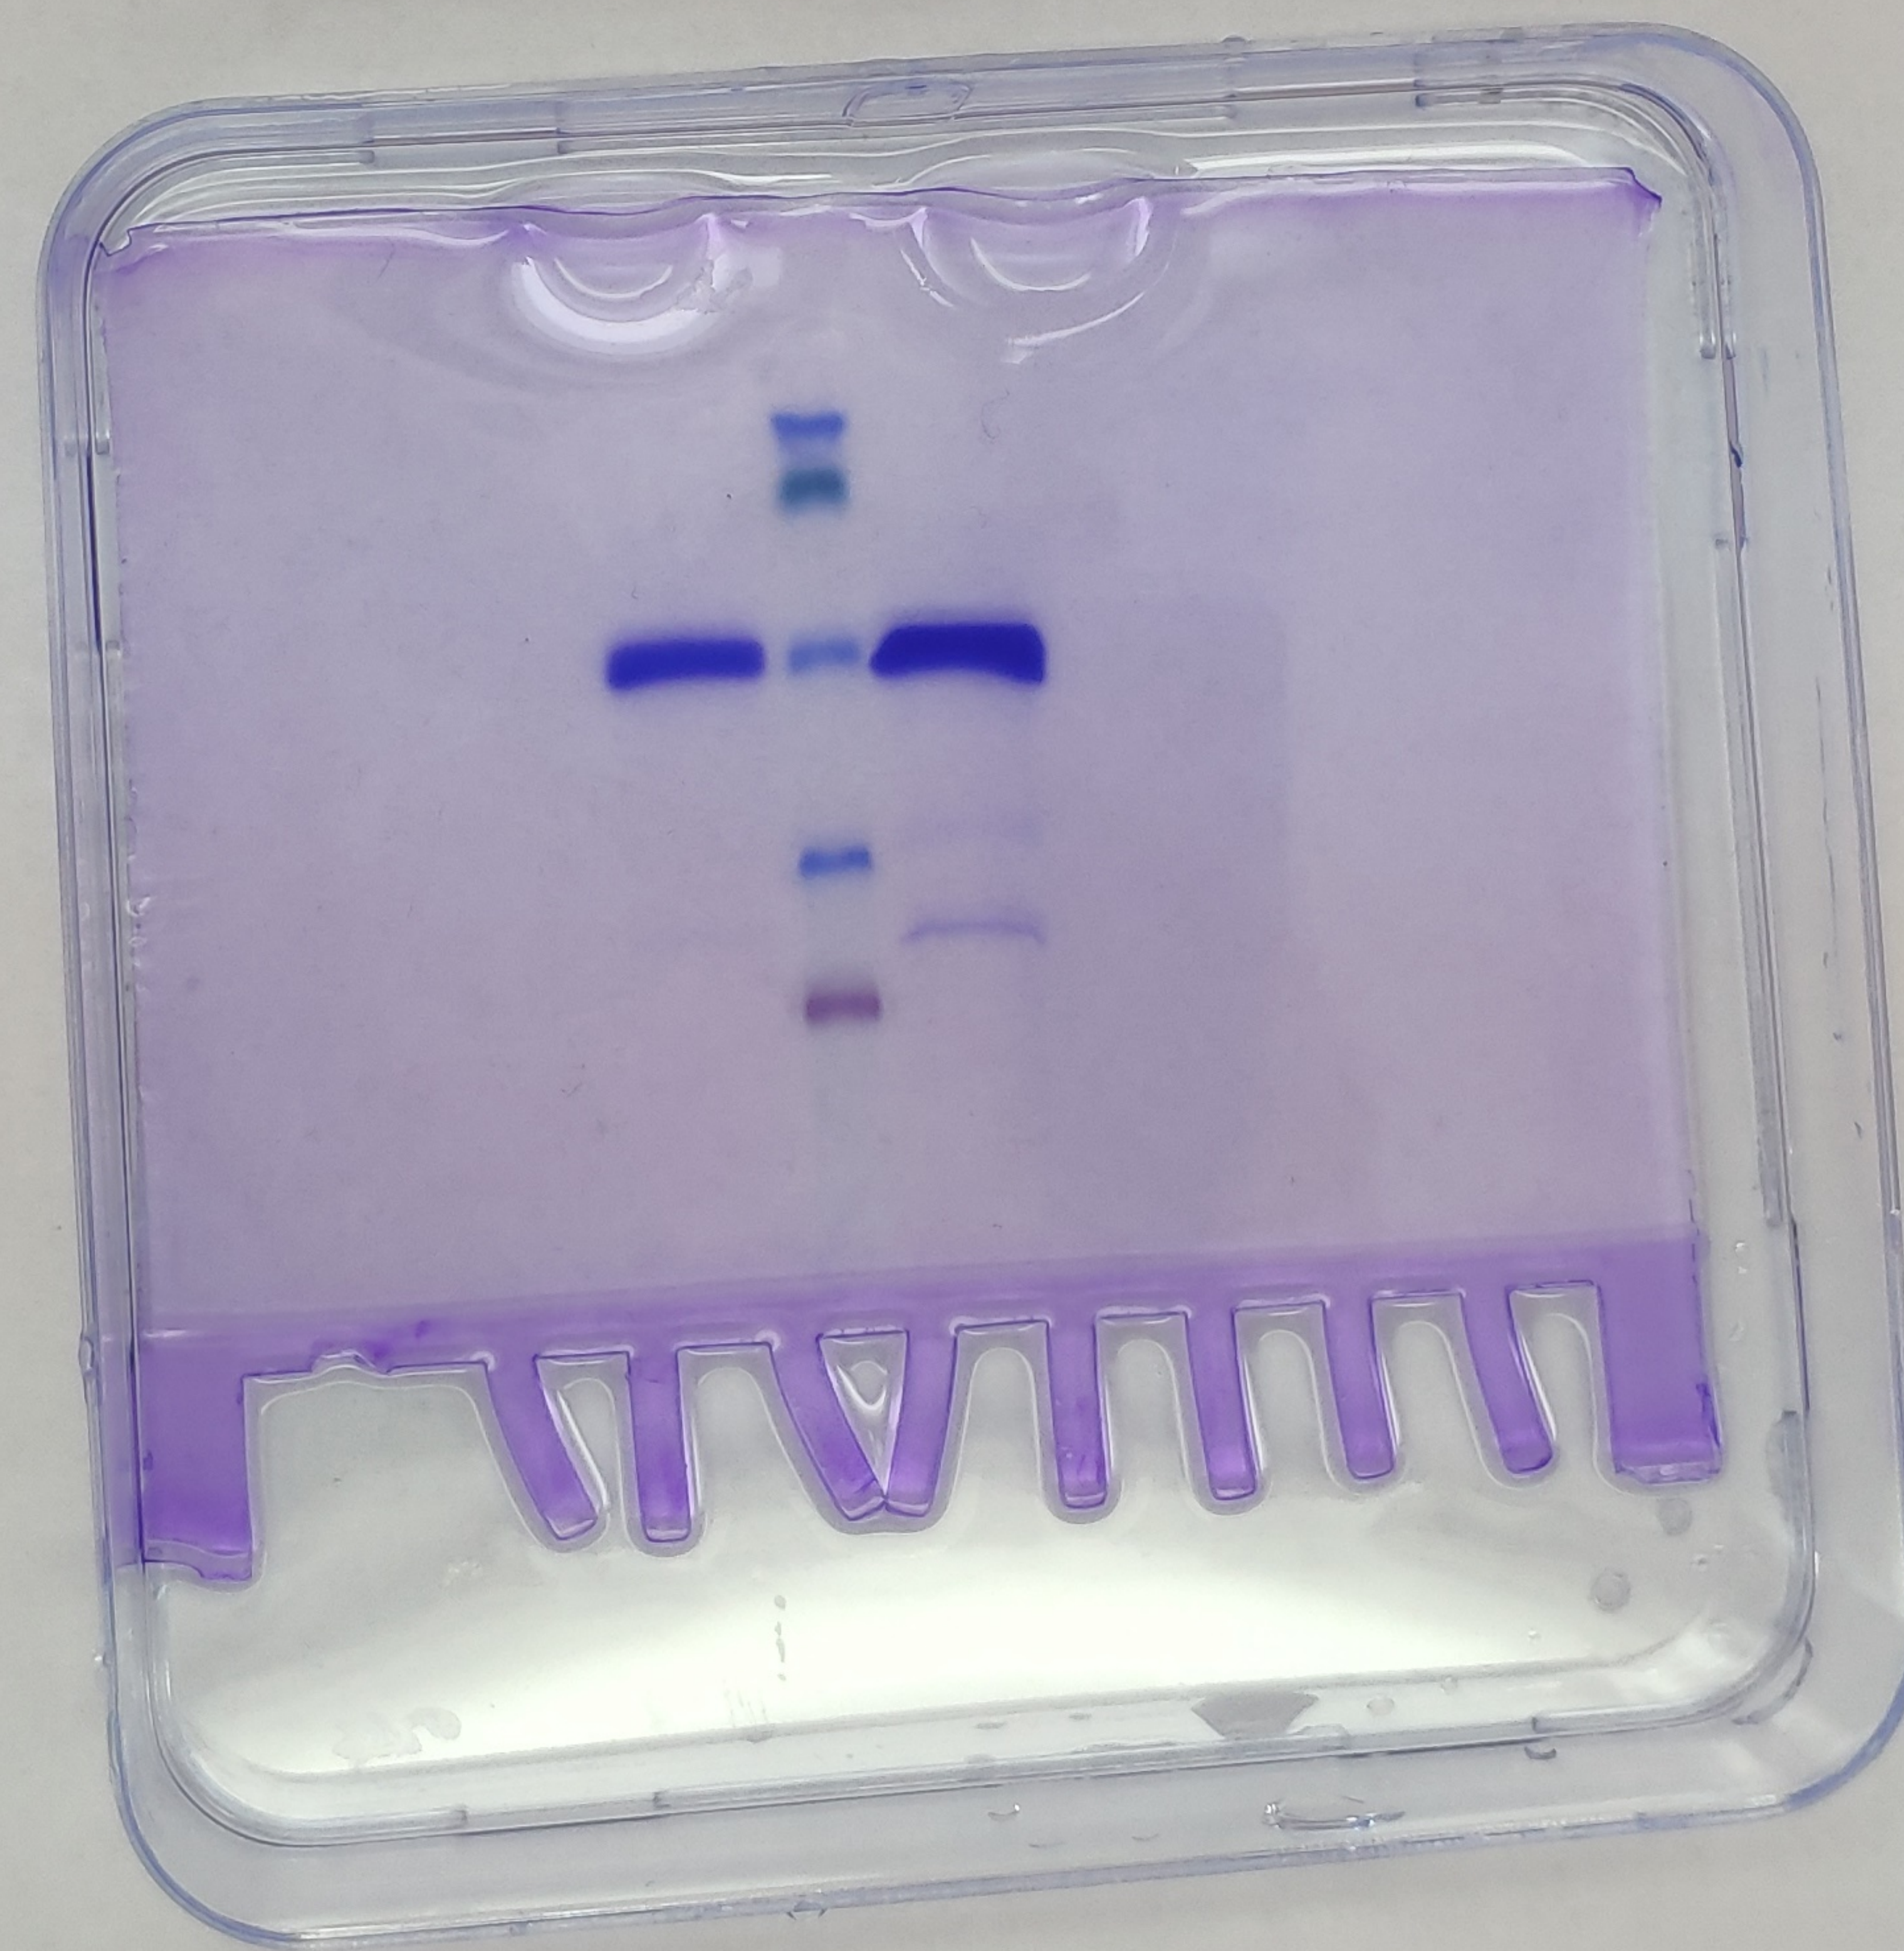

Supplement: d4ra02022g1.pdf [file d4ra02022g1.pdf]
